# Supplementary material for: Electric organ discharge from electric eel facilitates DNA transformation into teleost larvae in laboratory conditions
Source: PeerJ. 2023 Dec 4;11:e16596. doi: 10.7717/peerj.16596 (PMC10702328; doi:10.7717/peerj.16596)
Supplement: Supplemental Information 3 — The raw data for the numbers of samples used to draw the graphs in Figure 4. [file peerj-11-16596-s003.xlsx]

## Sheet: Table 1
		Fish numbers in each trial															Total
EOD−/DNA−	Tested	40	40	40	40	40	80	52	50	40	40	40	40				542
	Survived	40	39	38	40	40	78	52	48	40	38	40	40				533
	GFP-positive	0	0	0	0	0	0	0	0	0	0	0	0				0
EOD−/DNA+	Tested	40	40	40	54	50	50	50	40	40							404
	Survived	38	40	36	52	49	47	48	40	38							388
	GFP-positive	0	0	1	0	0	1	0	0	0							2
EOD+/DNA−	Tested	40	40	20	40	40	20	40	40	20							300
	Survived	37	39	19	39	39	20	28	30	12							263
	GFP-positive	0	0	0	0	0	0	1	0	2							3
EOD+/DNA+	Tested	20	20	49	39	40	29	29	31	40	38	40	40	40	40	37	532
	Survived	19	20	47	39	36	28	28	30	37	36	30	27	26	35	30	468
	GFP-positive	0	0	3	0	3	0	1	0	9	1	0	2	1	2	3	25
Table S1. Experimental values of electric eel EOD-induced electroporation
